# Supplementary material
Source: PubMed Central journal article supplement (PMC4653110)
Supplement: supp_WNL.0000000000002106_Supplemental_data.pdf [file supp_WNL.0000000000002106_Supplemental_data.pdf]

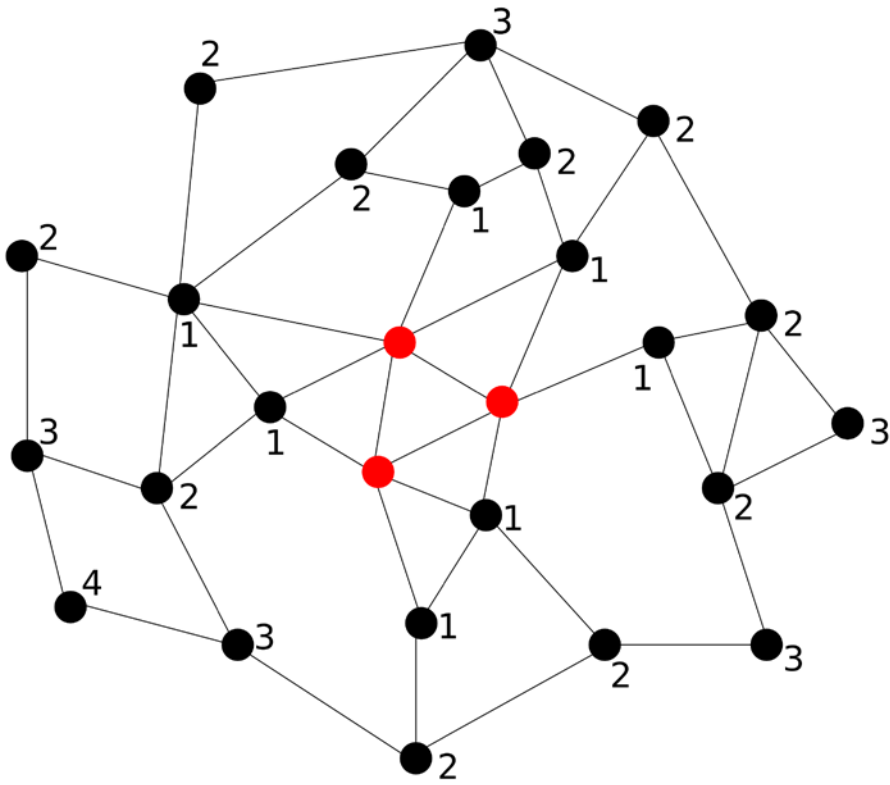

**Figure e-1. Geodesic distance.**

Example of the geodesic distance from a given region (red) defined as the number of edges of the shortest path connecting each vertex to that region.

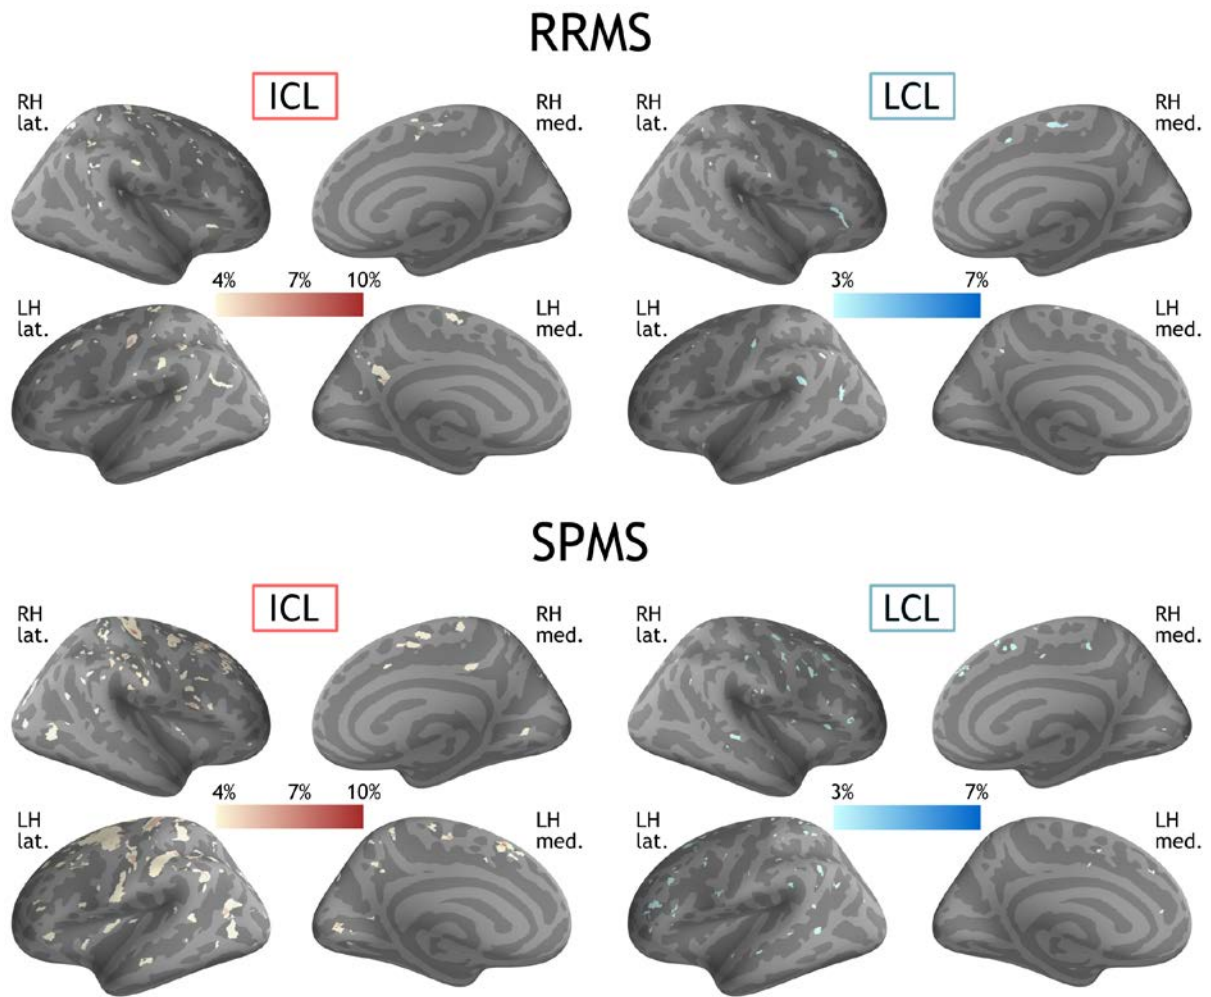

**Figure e-2. Overlay on “fsaverage” template of cortical lesion probability maps in RRMS and SPMS subgroups.** The color overlay represents the vertex-wise frequency of cortical lesion occurrence. ICL: intracortical lesion; LCL: leukocortical lesion.
